# Supplementary material for: AlPO-18 membranes for CO2/CH4 separation
Source: Royal Society of Chemistry journal article supplement (doi:10.1039/c2cc17249f), 2012-01-01
Supplement: c2cc17249f.pdf [file c2cc17249f.pdf]

## Supporting Information

### AlPO-18 Membranes for CO<sub>2</sub>/CH<sub>4</sub> Separation

Maria L. Carreon<sup>a</sup>, Shiguang Li<sup>b\*\*</sup>, Moises A. Carreon<sup>c\*</sup>

<sup>a</sup>Conn Center for Renewable Energy Research, University of Louisville, Louisville KY 40292.

<sup>b</sup>State Key Laboratory of Materials-Oriented Chemical Engineering, Nanjing University of Technology, Nanjing 210009, China.

<sup>c</sup>Department of Chemical Engineering, University of Louisville, Louisville, Kentucky, 40292.

\* corresponding author: [macarr15@louisville.edu](mailto:macarr15@louisville.edu) (Phone: 502-852-4103; Fax: 502-852-6355)

\*\* co-corresponding author: [sgli@njut.edu.cn](mailto:sgli@njut.edu.cn)

### Experimental

#### 1. Synthesis of AlPO-18 seeds

In a typical synthesis, 6.2 g of aluminum isopropoxide (Al(*i*-C<sub>3</sub>H<sub>7</sub>O)<sub>3</sub>, >99.99% metal basis, Aldrich), 23 g of deionized H<sub>2</sub>O, and 40.2 g of tetraethylammonium hydroxide ((C<sub>2</sub>H<sub>5</sub>)<sub>4</sub>NOH, 35 wt %, Sigma-Aldrich) were stirred for about 2 h to form a homogeneous solution. To this solution, 11 g of phosphoric acid (H<sub>3</sub>PO<sub>4</sub>, 85 wt %, Aldrich) was added dropwise, and the solution was aged for 24 hrs at room temperature under vigorous stirring. The solution was then placed in a sealed Teflon-lined autoclave (Parr Instrument Company) under autogenous pressure and treated hydrothermally at 473 K for 72 h in a conventional oven. After the solution was cooled to room temperature, the seeds were centrifuged at 4000 rpm for 15 min to separate the seeds and the seeds were washed with deionized water. Centrifugation-washing process was

repeated 3 times. The resultant precipitate was dried overnight at 343 K. The template was removed from the SAPO-34 framework by calcination at 773 K using flowing air in a computer-controlled muffle furnace, using a ramp procedure at heating and cooling rates of 1 K/min and 10 K/min respectively. The seed gel molar ratio was:  $1\text{Al}_2\text{O}_3:3.15\text{P}_2\text{O}_5:6.3\text{TEAOH}:185\text{H}_2\text{O}$ . In addition, AlPO-18 seeds were prepared using aluminum tri-sec-butoxide ( $\text{C}_{12}\text{H}_{27}\text{AlO}_3$ , 97% Aldrich) as the aluminium source, and following the same procedure as above, and the same seed gel molar ratio.

## 2. AlPO-18 seeds characterization

The morphological features of AlPO-18 crystals were inspected with a FE-SEM (FEI Nova 600) with an acceleration voltage of 6 kV. The crystalline structure was analyzed by XRD patterns collected on a Bruker D8 Discover diffractometer at 40 kV, 40mA with Cu  $K\alpha$  radiation. The surface area and adsorption-desorption isotherm measurements were carried out on Micromeritics Tristar 3000 porosimeter at 77 K using liquid nitrogen as coolant. Prior to the nitrogen adsorption experiments, the samples were degassed at 573 K for 3 h.

## 3. Separation performance

The separation performance of the AlPO-18 membranes for equimolar  $\text{CO}_2/\text{CH}_4$  gas mixtures was evaluated in flow separation system described elsewhere.<sup>a,b</sup> The membranes were mounted in a stainless steel module with silicone O-rings as seals on both ends. The pressure on each side of the membrane was independently controlled. The driving force across the membrane was provided by pressure drop. In all separation experiments, the pressure drop was 138 KPa and the permeate pressure was 99.5 KPa (atmospheric pressure). The gas flux was measured by a soap

film bubble flow meter. The total feed flow rate was 100 mL/min. The compositions of the feed, retentate, and permeate streams were measured, after attaining the steady state, using a CARLE Series 400 gas chromatograph equipped with a thermal conductivity detector and HAYESEP-A column. The oven was kept at 60 °C. Because one component preferentially permeates through the membrane in the cross-flow configuration, the partial pressures in the feed and retentate are quite different. Therefore, a logarithm of the mean partial pressure drop was used to calculate the driving force. The separation selectivity was determined as the ratio of the permeances. The permeances were calculated as the fluxes divided by the partial pressure driving forces.

a) S.R. Venna, M.A.Carreon, *Langmuir* 2011, **27**, 2888.

b) S.R. Venna, M.A.Carreon, *Journal of the American Chemical Society* 2010, **132**, 76.

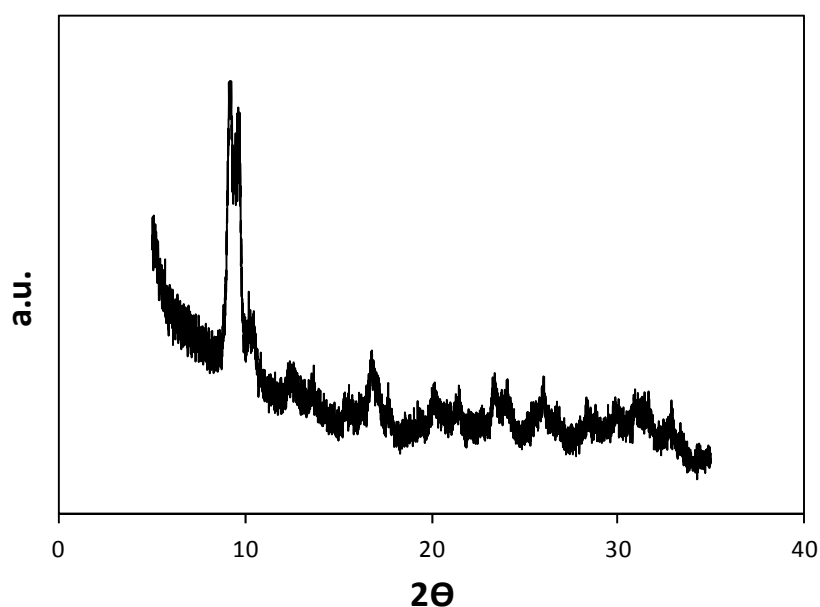

**Figure S1.** XRD pattern of the ALPO-18 membrane (M1)
